# Supplementary material
Source: publisher site journal article supplement (https://www.dovepress.com/article/122282)
Supplement: Supplementary file 1 [file get_supplementary_file.php]

# Supplemental Materials

## Major Air Pollutants and Acute Risk of COPD: A Systematic Review and Meta-analysis

Jinhui Li,<sup>1,2</sup> Shengzhi Sun,<sup>1,2</sup> Robert Tang,<sup>1,2</sup> Hong Qiu,<sup>2</sup> Qingyuan Huang,<sup>3</sup>  
Tonya G Mason,<sup>2</sup> Linwei Tian,<sup>1,2\*</sup>

## Contents

|                           |                                                                                                                   |
|---------------------------|-------------------------------------------------------------------------------------------------------------------|
| <b>S1</b>                 | <b>Detailed search strategy</b>                                                                                   |
| <b>S2</b>                 | <b>Eligibility criteria</b>                                                                                       |
| <b>Table S1</b>           | <b>Contextual details of included studies</b>                                                                     |
| <b>Table S2</b>           | <b>Sensitivity analysis of included studies (Before &amp; after removing studies with increased risk of bias)</b> |
| <b>Table S3</b>           | <b>Results of subgroup analysis</b>                                                                               |
| <b>Table S4</b>           | <b>Meta-regression analyses of the studies</b>                                                                    |
| <b>Figure S1</b>          | <b>Association between air pollutants and hospitalization/mortality for COPD in overall analyses</b>              |
| <b>Figure S2</b>          | <b>Funnel plots for RR of mortality/ hospitalization for COPD exposure to air pollutants</b>                      |
| <b>Figure Legends</b>     |                                                                                                                   |
| <b>Included Reference</b> |                                                                                                                   |

## **S1 Detailed search strategy**

### **1). MEDLINE and EMBASE**

1. exp chronic obstructive pulmonary disease.mp. or COPD. mp. or Chronic Obstructive Pulmonary Disease.mp./
2. exp chronic obstructive airway disease. mp. or chronic obstructive lung disease.mp. or chronic airflow obstruction.mp. or pulmonary emphysema.mp. /
3. 1 or 2
4. [(air or atmosphere or atmospheric) adj (pollutant\* or polluted or contamination or contaminated)].mp.(mp=ti, ab, sh, tn, hw, ot, dm, mf, ps, rs, ps, nm, ui, tx, ct, kw)/
5. exp ambience particulate matter.mp. or PM<sub>2.5</sub>.mp or PM<sub>10</sub>. mp./
6. exp ozone.mp. or Ozone.mp. or O<sub>3</sub>.mp./
7. exp carbon monoxide.mp. or Carbon Monoxide .mp. or CO.mp./
8. exp sulphur dioxide.mp. or Sulphur Dioxide.mp. or SO<sub>2</sub>. mp./
9. exp nitrogen dioxide.mp. or Nitrogen Dioxide.mp. or NO<sub>2</sub>. mp./
10. 4 or 5 or 6 or 7 or 8 or 9
11. 3 and 10

### **2). Global Health, Web of Science, CINAHL, EBSCO, Cochrane Library**

“chronic obstructive pulmonary disease” OR “COPD” OR “chronic obstructive airway disease” OR “Chronic Airflow obstructive” OR “Pulmonary Emphysema”

AND

“Air pollution” OR “ambient particular matter” OR “PM<sub>2.5</sub>” OR “PM<sub>10</sub>” OR “Ozone” OR “O<sub>3</sub>” OR “carbon monoxide” OR “CO” OR “sulfur dioxide” OR “SO<sub>2</sub>” OR “nitrogen dioxide” OR “NO<sub>2</sub>” OR “Nitrogen oxides” OR “NO<sub>x</sub>”)

## **S2 Eligibility criteria**

### **Inclusion Criteria**

1. No language limitation
2. Full-length peer-reviewed studies with original data
3. Time-series studies and case-crossover studies
4. Had adequate sample sizes
5. Focus on the short-time air pollution exposure to the acute effects of COPD exacerbation, including mortality and hospitalization admission

### **Exclusion Criteria**

1. Studies about case report/series, commentaries, letters, editorials, summaries, reviews
2. Focus on vivo or vitro or toxicological or mechanisms studies
3. Duplicate publications
4. Just conduct the long-term air pollution researches
5. The duration of study less than one year
6. No interested endpoints reported

**Table S1 Contextual details of included studies**

| Study(year)                                      | Lag exposure | Species             | average concentration | lag-pattern | Model | Air pollutant concentration | Pollutant measurement quality score | Outcome measurements | Adjustments | Generalizability |
|--------------------------------------------------|--------------|---------------------|-----------------------|-------------|-------|-----------------------------|-------------------------------------|----------------------|-------------|------------------|
| <b>Kloog <i>et al</i> 2014<sup>1</sup></b>       | Lag01        | PM <sub>2.5</sub>   | 10.8±5.7              | single-day  | mono  | mean                        | 1                                   | 1                    | 0           | 1                |
| <b>Meng <i>et al</i> 2013<sup>2</sup></b>        | Lag01        | BJ PM <sub>10</sub> | 138.9±87.0            | single-day  | both  | mean                        | 1                                   | 1                    | 1           | 1                |
|                                                  | Lag0-1       | BJ SO <sub>2</sub>  | 41.4±43.8             |             |       |                             |                                     |                      |             |                  |
|                                                  | Lag0-2       | BJ NO <sub>2</sub>  | 57.6±24.7             |             |       |                             |                                     |                      |             |                  |
|                                                  | Lag0-3       | SH PM <sub>10</sub> | 102±64.8              |             |       |                             |                                     |                      |             |                  |
|                                                  |              | SH SO <sub>2</sub>  | 44.7±24.2             |             |       |                             |                                     |                      |             |                  |
|                                                  |              | SH NO <sub>2</sub>  | 66.6±25.0             |             |       |                             |                                     |                      |             |                  |
|                                                  |              | GZ PM <sub>10</sub> | 73.8±40.2             |             |       |                             |                                     |                      |             |                  |
|                                                  |              | GZ SO <sub>2</sub>  | 50.1±33.0             |             |       |                             |                                     |                      |             |                  |
|                                                  |              | GZ NO <sub>2</sub>  | 65.9±31.7             |             |       |                             |                                     |                      |             |                  |
|                                                  |              | HK PM <sub>10</sub> | 51.6±22.3             |             |       |                             |                                     |                      |             |                  |
|                                                  |              | HK SO <sub>2</sub>  | 17.8±12.1             |             |       |                             |                                     |                      |             |                  |
|                                                  |              | HK NO <sub>2</sub>  | 58.7±20.1             |             |       |                             |                                     |                      |             |                  |
| <b>Tellez-Rojo <i>et al</i> 2000<sup>3</sup></b> | Lag1         | PM <sub>10</sub>    | 75.1±23.7             | single-day  | multi | both                        | 1                                   | 1                    | 1           | 1                |
|                                                  | Lag2         | O <sub>3</sub>      | 134.5±33.4            |             |       |                             |                                     |                      |             |                  |
|                                                  | Lag3         | SO <sub>2</sub>     | 0.02±0.005            |             |       |                             |                                     |                      |             |                  |
|                                                  | Lag4         | NO <sub>2</sub>     | 0.038±0.01            |             |       |                             |                                     |                      |             |                  |
|                                                  | Lag5         |                     |                       |             |       |                             |                                     |                      |             |                  |
| <b>Wordley <i>et al</i> 1997<sup>4</sup></b>     | Lag1         | PM <sub>10</sub>    | 70.0                  | single-day  | both  | mean                        | 1                                   | 1                    | 1           | 1                |
|                                                  | Lag2         |                     |                       |             |       |                             |                                     |                      |             |                  |
|                                                  | Lag3         |                     |                       |             |       |                             |                                     |                      |             |                  |
| <b>Neuberger <i>et al</i> 2007<sup>5</sup></b>   | Lag0-1       | NO <sub>2</sub>     | 31.0                  | mean days   | mono  | mean                        | 1                                   | 1                    | 1           | 0                |
|                                                  | Lag0-7       | SO <sub>2</sub>     | 5.0                   |             |       |                             |                                     |                      |             |                  |
|                                                  |              | O <sub>3</sub>      | 46.0                  |             |       |                             |                                     |                      |             |                  |
|                                                  |              | TSP                 | 31.0                  |             |       |                             |                                     |                      |             |                  |
|                                                  |              | PM <sub>10</sub>    | 30.0                  |             |       |                             |                                     |                      |             |                  |



|                                           |        |                   |            |            |      |      |   |   |   |   |
|-------------------------------------------|--------|-------------------|------------|------------|------|------|---|---|---|---|
| <b>Arbex et al 2009<sup>12</sup></b>      | Lag0   | CO                | 2.7±1.2    | both       | mono | both | 1 | 1 | 1 | 1 |
|                                           | Lag1   | O <sub>3</sub>    | 95.8±44.2  |            |      |      |   |   |   |   |
|                                           | Lag2   | NO <sub>2</sub>   | 120.3±49.9 |            |      |      |   |   |   |   |
|                                           | Lag3   | SO <sub>2</sub>   | 14.0±6.2   |            |      |      |   |   |   |   |
|                                           | Lag4   | PM <sub>10</sub>  | 48.7±21.9  |            |      |      |   |   |   |   |
|                                           | Lag5   |                   |            |            |      |      |   |   |   |   |
|                                           | Lag6   |                   |            |            |      |      |   |   |   |   |
| <b>Forastiere et al 2008<sup>13</sup></b> | Lag0-1 | PM <sub>10</sub>  | 40.0       | mean days  | mono | mean | 1 | 1 | 1 | 1 |
| <b>Ko et al 2007<sup>14</sup></b>         | Lag0   | NO <sub>2</sub>   | 51.2±21.8  | both       | both | mean | 0 | 1 | 1 | 1 |
|                                           | Lag1   | PM <sub>10</sub>  | 50.1±23.9  |            |      |      |   |   |   |   |
|                                           | Lag2   | O <sub>3</sub>    | 31.0±16.2  |            |      |      |   |   |   |   |
|                                           | Lag3   | SO <sub>2</sub>   | 15.0±11.6  |            |      |      |   |   |   |   |
|                                           | Lag4   | PM <sub>2.5</sub> | 35.7±20.6  |            |      |      |   |   |   |   |
|                                           | Lag5   |                   |            |            |      |      |   |   |   |   |
|                                           | Lag0-1 |                   |            |            |      |      |   |   |   |   |
|                                           | Lag0-2 |                   |            |            |      |      |   |   |   |   |
|                                           | Lag0-3 |                   |            |            |      |      |   |   |   |   |
|                                           | Lag0-4 |                   |            |            |      |      |   |   |   |   |
|                                           | Lag0-5 |                   |            |            |      |      |   |   |   |   |
| <b>Zanobetti et al 2000<sup>15</sup></b>  | Lag0   | PM <sub>10</sub>  | <50.0      | single-day | both | mean | 1 | 1 | 0 | 1 |
|                                           | Lag1   |                   |            |            |      |      |   |   |   |   |
|                                           | Lag2   |                   |            |            |      |      |   |   |   |   |
|                                           | Lag3   |                   |            |            |      |      |   |   |   |   |
|                                           | Lag4   |                   |            |            |      |      |   |   |   |   |
| <b>Morgan et al 1998<sup>16</sup></b>     | Lag0   | Particulates      | 0.3±0.2    | both       | both | both | 1 | 1 | 1 | 1 |
|                                           | Lag1   | O <sub>3</sub>    | 25.0±13.0  |            |      |      |   |   |   |   |
|                                           | Lag2   | NO <sub>2</sub>   | 15.0±6.0   |            |      |      |   |   |   |   |
|                                           | Lag0-2 |                   |            |            |      |      |   |   |   |   |
| <b>Anderson et al 1997<sup>17</sup></b>   | Lag1   | SO <sub>2</sub>   | 33.3       |            |      | mean | 0 | 1 | 1 | 1 |

|                                       |        |                      |           |      |      |      |   |   |   |   |
|---------------------------------------|--------|----------------------|-----------|------|------|------|---|---|---|---|
|                                       | Lag1-3 | NO <sub>2</sub>      | 52.8      | both | mono |      |   |   |   |   |
|                                       | Lag1-5 | BS                   | 21.6      |      |      |      |   |   |   |   |
|                                       |        | TSP                  | 85.5      |      |      |      |   |   |   |   |
|                                       |        | O <sub>3</sub>       | 46.8      |      |      |      |   |   |   |   |
| <b>Peel et al 2005<sup>18</sup></b>   | Lag0   | PM <sub>10</sub>     | 27.9±12.3 | both | both | mean | 1 | 1 | 1 | 1 |
|                                       | Lag1   | NO <sub>2</sub>      | 45.9±17.3 |      |      |      |   |   |   |   |
|                                       | Lag2   | CO                   | 1.8±1.2   |      |      |      |   |   |   |   |
|                                       |        | SO <sub>2</sub>      | 16.5±17.1 |      |      |      |   |   |   |   |
|                                       |        | O <sub>3</sub>       | 55.6±23.8 |      |      |      |   |   |   |   |
|                                       |        | PM <sub>2.5</sub>    | 19.2±8.9  |      |      |      |   |   |   |   |
| <b>Chen et al 2003<sup>19</sup></b>   | Lag0   | PM <sub>10</sub>     | 13.3±6.1  | both | both | mean | 0 | 1 | 1 | 1 |
|                                       | Lag1   | PM <sub>10-2.5</sub> | 5.6±3.6   |      |      |      |   |   |   |   |
|                                       | Lag2   | PM <sub>2.5</sub>    | 7.7±3.7   |      |      |      |   |   |   |   |
|                                       | Lag3   | COH                  | 0.3±0.1   |      |      |      |   |   |   |   |
|                                       | Lag4   | CO                   | 0.7±0.3   |      |      |      |   |   |   |   |
|                                       | Lag5   | O <sub>3</sub>       | 14.3±6.7  |      |      |      |   |   |   |   |
|                                       | Lag6   | NO <sub>2</sub>      | 16.8±4.3  |      |      |      |   |   |   |   |
|                                       | Lag7   | SO <sub>2</sub>      | 3.5±1.8   |      |      |      |   |   |   |   |
|                                       | Lag0-3 |                      |           |      |      |      |   |   |   |   |
| <b>Wong et al 2002<sup>20</sup></b>   | Lag0   | NO <sub>2</sub>      | 56.4±19.2 | both | both | mean | 0 | 1 | 1 | 1 |
|                                       | Lag1   | PM <sub>10</sub>     | 51.5±24.8 |      |      |      |   |   |   |   |
|                                       | Lag2   | O <sub>3</sub>       | 33.9±23.2 |      |      |      |   |   |   |   |
|                                       | Lag3   | SO <sub>2</sub>      | 16.7±11.6 |      |      |      |   |   |   |   |
|                                       | Lag4   |                      |           |      |      |      |   |   |   |   |
|                                       | Lag5   |                      |           |      |      |      |   |   |   |   |
|                                       | Lag0-5 |                      |           |      |      |      |   |   |   |   |
|                                       | Lag0-3 |                      |           |      |      |      |   |   |   |   |
| <b>Tenias et al 2002<sup>21</sup></b> | Lag0   | BS                   | 38.8      |      | both | both | 0 | 0 | 1 | 1 |
|                                       | Lag1   | NO <sub>2</sub>      | 57.7      |      |      |      |   |   |   |   |
|                                       | Lag2   | O <sub>3</sub>       | 62.8      |      |      |      |   |   |   |   |
|                                       | Lag3   | SO <sub>2</sub>      | 26.6      |      |      |      |   |   |   |   |







|                                         |         |                  |            |            |      |      |   |   |   |   |
|-----------------------------------------|---------|------------------|------------|------------|------|------|---|---|---|---|
| <b>Lin et al 2012<sup>31</sup></b>      | Lag0    | NO <sub>2</sub>  | 33.0±43.9  | mean days  | both | both | 1 | 1 | 1 | 1 |
|                                         | Lag1    | O <sub>x</sub>   | 48.8±21.8  |            |      |      |   |   |   |   |
|                                         | Lag2    | O <sub>3</sub>   | 25.5±24.3  |            |      |      |   |   |   |   |
|                                         | Lag3    | PM <sub>10</sub> | 48.4±121.2 |            |      |      |   |   |   |   |
|                                         | Lag4    |                  |            |            |      |      |   |   |   |   |
|                                         | Lag5    |                  |            |            |      |      |   |   |   |   |
| <b>Bateson et al 2004<sup>32</sup></b>  | Lag1    | PM <sub>10</sub> | 37.6±15.5  | single-day | mono | both | 0 | 1 | 1 | 1 |
| <b>Sunyer et al 2001<sup>33</sup></b>   | Lag2    | PM <sub>10</sub> | 13.5       | mean days  | mono | mean | 0 | 0 | 1 | 0 |
|                                         |         | NO <sub>2</sub>  | 8.5        |            |      |      |   |   |   |   |
|                                         |         | O <sub>3</sub>   | 10.5       |            |      |      |   |   |   |   |
|                                         |         | CO               | 2.3        |            |      |      |   |   |   |   |
| <b>Kan et al 2003<sup>34</sup></b>      | Lag0-5  | NO <sub>2</sub>  | 91.14±15.3 | mean days  | mono | mean | 0 | 1 | 0 | 1 |
|                                         |         | SO <sub>2</sub>  | 42.49±6.1  |            |      |      |   |   |   |   |
|                                         |         | PM <sub>10</sub> | 32.46±3.6  |            |      |      |   |   |   |   |
| <b>Braga et al 2001<sup>35</sup></b>    | Lag0    | PM <sub>10</sub> | 33.1       | both       | mono | mean | 0 | 1 | 1 | 1 |
|                                         | Lag0-1  |                  |            |            |      |      |   |   |   |   |
| <b>Schwartz et al 1992<sup>36</sup></b> | Lag2    | TSP              | 77.2±22.4  | mean       | both | mean | 0 | 1 | 1 | 1 |
|                                         |         | SO <sub>2</sub>  | 21±3.8     |            |      |      |   |   |   |   |
| <b>Fischer et al 2003<sup>37</sup></b>  | Lag1 O3 | PM <sub>10</sub> | 34±68.4    | both       | mono | mean | 0 | 1 | 1 | 1 |
|                                         | Lag0-6  | BS               | 10±30.4    |            |      |      |   |   |   |   |
|                                         |         | O <sub>3</sub>   | 47±57.4    |            |      |      |   |   |   |   |
|                                         |         | NO <sub>2</sub>  | 32±50.0    |            |      |      |   |   |   |   |
|                                         |         | SO <sub>2</sub>  | 10±62.7    |            |      |      |   |   |   |   |
| <b>Wong et al 2009<sup>38</sup></b>     | Lag0-1  | CO               | 406±624.0  |            |      |      |   |   |   |   |
|                                         |         | NO <sub>2</sub>  | 58.7±20.0  | mean       |      | mean | 0 | 1 | 1 | 1 |
|                                         |         | SO <sub>2</sub>  | 17.8±12.1  |            |      |      |   |   |   |   |
|                                         |         | PM <sub>10</sub> | 51.6±25.3  |            |      |      |   |   |   |   |
| <b>Xu et al 2009<sup>39</sup></b>       | Lag0-3  | O <sub>3</sub>   | 36.9±23.0  |            |      |      |   |   |   |   |
|                                         |         | TSP              | 430.4±67.9 | mean       |      | mean | 0 | 1 | 1 | 1 |
|                                         |         | SO <sub>2</sub>  | 196.9±12.3 |            |      |      |   |   |   |   |
| <b>Janssen et al 2002<sup>40</sup></b>  | Lag1/2  | PM <sub>10</sub> | NA         | mean       | mono | mean | 0 | 1 | 1 | 1 |

|                                         |        |                   |               |            |       |      |   |   |   |   |  |
|-----------------------------------------|--------|-------------------|---------------|------------|-------|------|---|---|---|---|--|
| <b>Dominici et al 2006<sup>41</sup></b> | Lag0   | PM <sub>2.5</sub> | 13.4±0.5      | both       | mono  |      |   |   |   |   |  |
|                                         | Lag1   |                   |               |            |       |      |   |   |   |   |  |
|                                         | Lag2   |                   |               |            |       |      |   |   |   |   |  |
| <b>Yang et al 2000<sup>42</sup></b>     | Lag1   | PM <sub>10</sub>  | 36.6±27.9     | single-day | mono  | mean | 0 | 1 | 1 | 1 |  |
| <b>Schwartz et al 1994<sup>43</sup></b> | Lag1   | PM <sub>10</sub>  | 24±3.3        | single-day | mono  | both | 0 | 1 | 1 | 1 |  |
|                                         |        | O <sub>3</sub>    | 41±7.6        |            |       |      |   |   |   |   |  |
| <b>Schwartz(s) et al 1994</b>           | Lag0-2 | PM <sub>10</sub>  | 25±4.3        | both       | mono  | both | 0 | 1 | 1 | 1 |  |
| <b>Schwartz(t) et al 1994</b>           | Lag0-2 | PM <sub>10</sub>  | 48±8.2        | mean       | mono  | both | 0 | 1 | 1 | 1 |  |
|                                         |        | O <sub>3</sub>    | 21±4.1        |            |       |      |   |   |   |   |  |
| <b>Sunyer et al 1993<sup>46</sup></b>   | Lag1   | SO <sub>2</sub>   | 49±7.9        | both       | multi | mean | 1 | 1 | 1 | 1 |  |
|                                         | Lag0-2 | BS                | 29±5.1        |            |       |      |   |   |   |   |  |
| <b>Lippmann et al 2000<sup>47</sup></b> | Lag1   | TSP               | 68.7±9.4      |            | multi | mean | 1 | 1 | 1 | 1 |  |
|                                         | Lag2   | PM <sub>10</sub>  | 45.4±7.9      |            |       |      |   |   |   |   |  |
|                                         | Lag0-1 | SO <sub>2</sub>   | 9.8±1.7       |            |       |      |   |   |   |   |  |
|                                         | Lag0-2 | NO <sub>2</sub>   | 23.3±3.1      |            |       |      |   |   |   |   |  |
|                                         | Lag0-3 | O <sub>3</sub>    | 20.9±4.0      |            |       |      |   |   |   |   |  |
| <b>Dab et al 1996<sup>48</sup></b>      | Lag0   | CO                | 0.9±0.1       |            |       |      |   |   |   |   |  |
|                                         |        | SO <sub>2</sub>   | 29.7          | both       | both  | both | 1 | 1 | 1 | 1 |  |
|                                         |        | BS                | 31.9          |            |       |      |   |   |   |   |  |
|                                         |        | PM <sub>13</sub>  | 50.8          |            |       |      |   |   |   |   |  |
|                                         |        | NO <sub>2</sub>   | 45.0          |            |       |      |   |   |   |   |  |
| <b>Leitte et al 2009<sup>49</sup></b>   | Lag0-7 | O <sub>3</sub>    | 27.7          |            |       |      |   |   |   |   |  |
|                                         |        | SO <sub>2</sub>   | 11.8±3.8      | both       | multi | both | 1 | 1 | 1 | 1 |  |
|                                         |        | NO <sub>2</sub>   | 4.7±1.6       |            |       |      |   |   |   |   |  |
| <b>Pande et al 2002<sup>50</sup></b>    | Lag1   | TSP               | 123.5±44.1    |            |       |      |   |   |   |   |  |
|                                         |        | TSP               | 417.5±151.0   | mean       | both  | mean | 1 | 1 | 1 | 1 |  |
|                                         |        | CO                | 5138.0±2651.0 |            |       |      |   |   |   |   |  |
|                                         |        | NOx               | 65.0±25.0     |            |       |      |   |   |   |   |  |
|                                         |        | SO <sub>2</sub>   | 23.0±11.5     |            |       |      |   |   |   |   |  |





**Table S2 Sensitivity analysis of included studies (Before & after removing studies with increased risk of bias)**

| <b>Pollutants</b>                          | <b>RR</b> | <b>LL</b> | <b>UL</b> |
|--------------------------------------------|-----------|-----------|-----------|
| <b>Nitrogen dioxide</b>                    |           |           |           |
| Overall estimate                           | 1.04      | 1.02      | 1.06      |
| Estimate excluding studies at risk of bias | 1.03      | 1.02      | 1.04      |
| <b>Carbon monoxide</b>                     |           |           |           |
| Overall estimate                           | 1.01      | 1.00      | 1.01      |
| Estimate excluding studies at risk of bias | 1.00      | 1.00      | 1.01      |
| <b>Sulphur dioxide</b>                     |           |           |           |
| Overall estimate                           | 1.01      | 1.00      | 1.01      |
| Estimate excluding studies at risk of bias | 1.01      | 1.00      | 1.01      |
| <b>Ozone</b>                               |           |           |           |
| Overall estimate                           | 1.01      | 1.01      | 1.02      |
| Estimate excluding studies at risk of bias | 1.02      | 1.01      | 1.03      |
| <b>PM<sub>2.5</sub></b>                    |           |           |           |
| Overall estimate                           | 1.01      | 1.00      | 1.01      |
| Estimate excluding studies at risk of bias | 1.02      | 1.02      | 1.03      |
| <b>PM<sub>10</sub></b>                     |           |           |           |
| Overall estimate                           | 1.01      | 1.01      | 1.01      |
| Estimate excluding studies at risk of bias | 1.02      | 1.02      | 1.02      |

**Table S3 Results of subgroup analysis**

| Subgroup Characteristics          | Gaseous Pollutants                         |                                            |                                           |                               | Particulate Pollutants                       |                                             |
|-----------------------------------|--------------------------------------------|--------------------------------------------|-------------------------------------------|-------------------------------|----------------------------------------------|---------------------------------------------|
|                                   | SO <sub>2</sub><br>(10 µg/m <sup>3</sup> ) | NO <sub>2</sub><br>(10 µg/m <sup>3</sup> ) | O <sub>3</sub><br>(10 µg/m <sup>3</sup> ) | CO<br>(100µg/m <sup>3</sup> ) | PM <sub>2.5</sub><br>(10 µg/m <sup>3</sup> ) | PM <sub>10</sub><br>(10 µg/m <sup>3</sup> ) |
| <b>Lag Subgroup</b>               |                                            |                                            |                                           |                               |                                              |                                             |
| Study number                      | 5                                          | 8                                          | 6                                         | 6                             | 4                                            | 7                                           |
| Lag exposure, d                   | 0                                          | 0                                          | 3                                         | 1                             | 0                                            | 3                                           |
| Heterogeneity, I <sup>2</sup> (%) | 91.5                                       | 94.9                                       | 5.9                                       | 61.4                          | 76.8                                         | 55.8                                        |
| RR (95%CI)                        | 1.007<br>(1.003,1.011)                     | 1.030<br>(1.026,1.033)                     | 1.013<br>(1.010,1.016)                    | 1.000<br>(0.987,1.003)        | 1.002<br>(1.001,1.005)                       | 1.009<br>(1.006,1.011)                      |
| Egger's test, <i>P</i>            | 0.312                                      | 0.780                                      | 0.351                                     | 0.410                         | 0.362                                        | 0.127                                       |
| <b>Quality Subgroup</b>           |                                            |                                            |                                           |                               |                                              |                                             |
| *Study number                     | 28                                         | 27                                         | 28                                        | 13                            | 15                                           | 34                                          |
| Heterogeneity, I <sup>2</sup>     | 76.5                                       | 98.1                                       | 63.0                                      | 92.9                          | 91.1                                         | 83.8                                        |
| RR (95%CI)                        | 1.000<br>(1.000,1.000)                     | 1.017<br>(1.015,1.019)                     | 0.958<br>(0.958,0.958)                    | 1.006<br>(1.002,1.011)        | 1.007<br>(1.005,1.009)                       | 1.008<br>(1.007,1.009)                      |
| Egger's test, <i>P</i>            | 0.007                                      | 0.147                                      | 0.001                                     | 0.163                         | 0.447                                        | 0.001                                       |
| <b>Property Subgroup</b>          |                                            |                                            |                                           |                               |                                              |                                             |
| ^Category (number)                | Age≥65(10)                                 | Mortality(7)                               | Age≥65(12)                                | Mortality(2)                  | Mortality(2)                                 | Non-Asian(10)                               |
| Heterogeneity, I <sup>2</sup>     | 62.4                                       | 21.9                                       | 27.1                                      | 2.7                           | 47.2                                         | 66.3                                        |
| RR (95%CI)                        | 1.004<br>(0.999,1.008)                     | 1.017<br>(1.012,1.021)                     | 1.009<br>(1.006,1.011)                    | 1.012<br>(0.999,1.026)        | 1.025<br>(1.007,1.043)                       | 1.006<br>(1.005,1.007)                      |
| Egger's test, <i>P</i>            | 0.129                                      | 0.881                                      | 0.315                                     | NA                            | NA                                           | 0.001                                       |

● Include good quality and intermediate quality

^ The category that reduced the heterogeneities most significantly

**Table S4 Meta-regression analyses of the studies**

**A: Carbon Monoxide**

| Stratified study    | No. of studies | Meta-regression |                        |                 | Heterogeneity      |                 |
|---------------------|----------------|-----------------|------------------------|-----------------|--------------------|-----------------|
|                     |                | Coef.           | Adj R <sup>2</sup> (%) | <i>p</i> -value | I <sup>2</sup> (%) | <i>p</i> -value |
| <b>Study design</b> |                | -0.166          | 14.52                  | 0.178           |                    |                 |
| Time-series         | 8              |                 |                        |                 | 75.5               | 0.001           |
| Case crossover      | 7              |                 |                        |                 | 98.5               | 0.001           |
| <b>Location</b>     |                | -0.271          | 38.49                  | 0.056           |                    |                 |
| Asia                | 5              |                 |                        |                 | 90.6               | 0.001           |
| Non-Asia            | 10             |                 |                        |                 | 70.8               | 0.001           |
| <b>COPD Subtype</b> |                | 0.066           | -10.90                 | 0.729           |                    |                 |
| Mortality           | 2              |                 |                        |                 | 2.70               | 0.311           |
| Hospital Admission  | 13             |                 |                        |                 | 78.5               | 0.001           |
| <b>Age</b>          |                | -0.125          | -13.83                 | 0.502           |                    |                 |
| ≥65                 | 12             |                 |                        |                 | 81.2               | 0.005           |
| All                 | 3              |                 |                        |                 | 77.4               | 0.001           |

**B: Sulfur dioxide**

| Stratified study    | No. of studies | Meta-regression |                        |                 | Heterogeneity      |                 |
|---------------------|----------------|-----------------|------------------------|-----------------|--------------------|-----------------|
|                     |                | Coef.           | Adj R <sup>2</sup> (%) | <i>p</i> -value | I <sup>2</sup> (%) | <i>p</i> -value |
| <b>Study design</b> |                | -0.137          | 8.06                   | 0.348           |                    |                 |
| Time-series         | 24             |                 |                        |                 | 73.3               | 0.001           |
| Case crossover      | 7              |                 |                        |                 | 76.3               | 0.001           |
| <b>Location</b>     |                | -0.005          | -3.46                  | 0.564           |                    |                 |
| Asia                | 14             |                 |                        |                 | 87.6               | 0.001           |
| Non-Asia            | 17             |                 |                        |                 | 64.0               | 0.001           |
| <b>COPD Subtype</b> |                | -0.004          | -1.28                  | 0.674           |                    |                 |
| Mortality           | 6              |                 |                        |                 | 90.9               | 0.001           |
| Hospital Admission  | 25             |                 |                        |                 | 74.7               | 0.001           |
| <b>Age</b>          |                | -0.001          | -10.68                 | 0.955           |                    |                 |
| ≥65                 | 25             |                 |                        |                 | 62.4               | 0.004           |
| All                 | 8              |                 |                        |                 | 74.7               | 0.001           |



**C: Nitrogen dioxide**

| Stratified study    | No. of studies | Meta-regression |                        |                 | Heterogeneity      |                 |
|---------------------|----------------|-----------------|------------------------|-----------------|--------------------|-----------------|
|                     |                | Coef.           | Adj R <sup>2</sup> (%) | <i>p</i> -value | I <sup>2</sup> (%) | <i>p</i> -value |
| <b>Study design</b> |                | -0.166          | 26.95                  | 0.014           |                    |                 |
| Time-series         | 24             |                 |                        |                 | 73.3               | 0.001           |
| Case crossover      | 9              |                 |                        |                 | 76.3               | 0.001           |
| <b>Location</b>     |                | 0.038           | -1.92                  | 0.419           |                    |                 |
| Asia                | 16             |                 |                        |                 | 87.6               | 0.001           |
| Non-Asia            | 17             |                 |                        |                 | 64.0               | 0.001           |
| <b>COPD Subtype</b> |                | 0.063           | -1.72                  | 0.405           |                    |                 |
| Mortality           | 7              |                 |                        |                 | 21.9               | 0.311           |
| Hospital Admission  | 27             |                 |                        |                 | 74.7               | 0.001           |
| <b>Age</b>          |                | 0.062           | -3.82                  | 0.470           |                    |                 |
| ≥65                 | 25             |                 |                        |                 | 62.4               | 0.004           |
| All                 | 8              |                 |                        |                 | 83.3               | 0.001           |

**D: Ozone**

| Stratified study    | No. of studies | Meta-regression |                        |                 | Heterogeneity      |                 |
|---------------------|----------------|-----------------|------------------------|-----------------|--------------------|-----------------|
|                     |                | Coef.           | Adj R <sup>2</sup> (%) | <i>p</i> -value | I <sup>2</sup> (%) | <i>p</i> -value |
| <b>Study design</b> |                | -0.072          | 13.31                  | 0.017           |                    |                 |
| Time-series         | 24             |                 |                        |                 | 90.0               | 0.001           |
| Case crossover      | 10             |                 |                        |                 | 84.0               | 0.001           |
| <b>Location</b>     |                | -0.047          | 4.87                   | 0.094           |                    |                 |
| Asia                | 5              |                 |                        |                 | 83.6               | 0.001           |
| Non-Asia            | 10             |                 |                        |                 | 88.4               | 0.001           |
| <b>COPD Subtype</b> |                | 0.030           | -2.88                  | 0.399           |                    |                 |
| Mortality           | 5              |                 |                        |                 | 74.8               | 0.311           |
| Hospital Admission  | 29             |                 |                        |                 | 78.8               | 0.001           |
| <b>Age</b>          |                | 0.0124          | -3.15                  | 0.685           |                    |                 |
| ≥65                 | 23             |                 |                        |                 | 27.1               | 0.179           |
| All                 | 11             |                 |                        |                 | 78.4               | 0.001           |

**E: PM<sub>2.5</sub>**

| Stratified study    | No. of studies | Meta-regression |                        |                 | Heterogeneity      |                 |
|---------------------|----------------|-----------------|------------------------|-----------------|--------------------|-----------------|
|                     |                | Coef.           | Adj R <sup>2</sup> (%) | <i>p</i> -value | I <sup>2</sup> (%) | <i>p</i> -value |
| <b>Study design</b> |                | -0.024          | 4.11                   | 0.300           |                    |                 |
| Time-series         | 8              |                 |                        |                 | 78.6               | 0.001           |
| Case crossover      | 7              |                 |                        |                 | 79.5               | 0.001           |
| <b>Location</b>     |                | -0.011          | 19.32                  | 0.137           |                    |                 |
| Asia                | 5              |                 |                        |                 | 82.7               | 0.001           |
| Non-Asia            | 10             |                 |                        |                 | 76.3               | 0.001           |
| <b>COPD Subtype</b> |                | -0.016          | -6.73                  | 0.602           |                    |                 |
| Mortality           | 2              |                 |                        |                 | 47.2               | 0.165           |
| Hospital Admission  | 13             |                 |                        |                 | 80.7               | 0.001           |
| <b>Age</b>          |                | 0.022           | -5.43                  | 0.344           |                    |                 |
| >=65                | 12             |                 |                        |                 | 66.3               | 0.018           |
| All                 | 3              |                 |                        |                 | 80.2               | 0.001           |

**F: PM<sub>10</sub>**

| Stratified study    | No. of studies | Meta-regression |                        |                 | Heterogeneity      |                 |
|---------------------|----------------|-----------------|------------------------|-----------------|--------------------|-----------------|
|                     |                | Coef.           | Adj R <sup>2</sup> (%) | <i>p</i> -value | I <sup>2</sup> (%) | <i>p</i> -value |
| <b>Study design</b> |                | -0.008          | 0.99                   | 0.224           |                    |                 |
| Time-series         | 27             |                 |                        |                 | 78.6               | 0.001           |
| Case crossover      | 11             |                 |                        |                 | 73.1               | 0.001           |
| <b>Location</b>     |                | -0.004          | -2.14                  | 0.540           |                    |                 |
| Asia                | 13             |                 |                        |                 | 72.7               | 0.001           |
| Non-Asia            | 25             |                 |                        |                 | 66.3               | 0.001           |
| <b>COPD Subtype</b> |                | 0.006           | 5.26                   | 0.328           |                    |                 |
| Mortality           | 14             |                 |                        |                 | 69.5               | 0.001           |
| Hospital Admission  | 24             |                 |                        |                 | 76.7               | 0.001           |
| <b>Age</b>          |                | 0.001           | -4.61                  | 0.943           |                    |                 |
| >=65                | 15             |                 |                        |                 | 69.2               | 0.001           |
| All                 | 26             |                 |                        |                 | 87.1               | 0.001           |

Figure S1

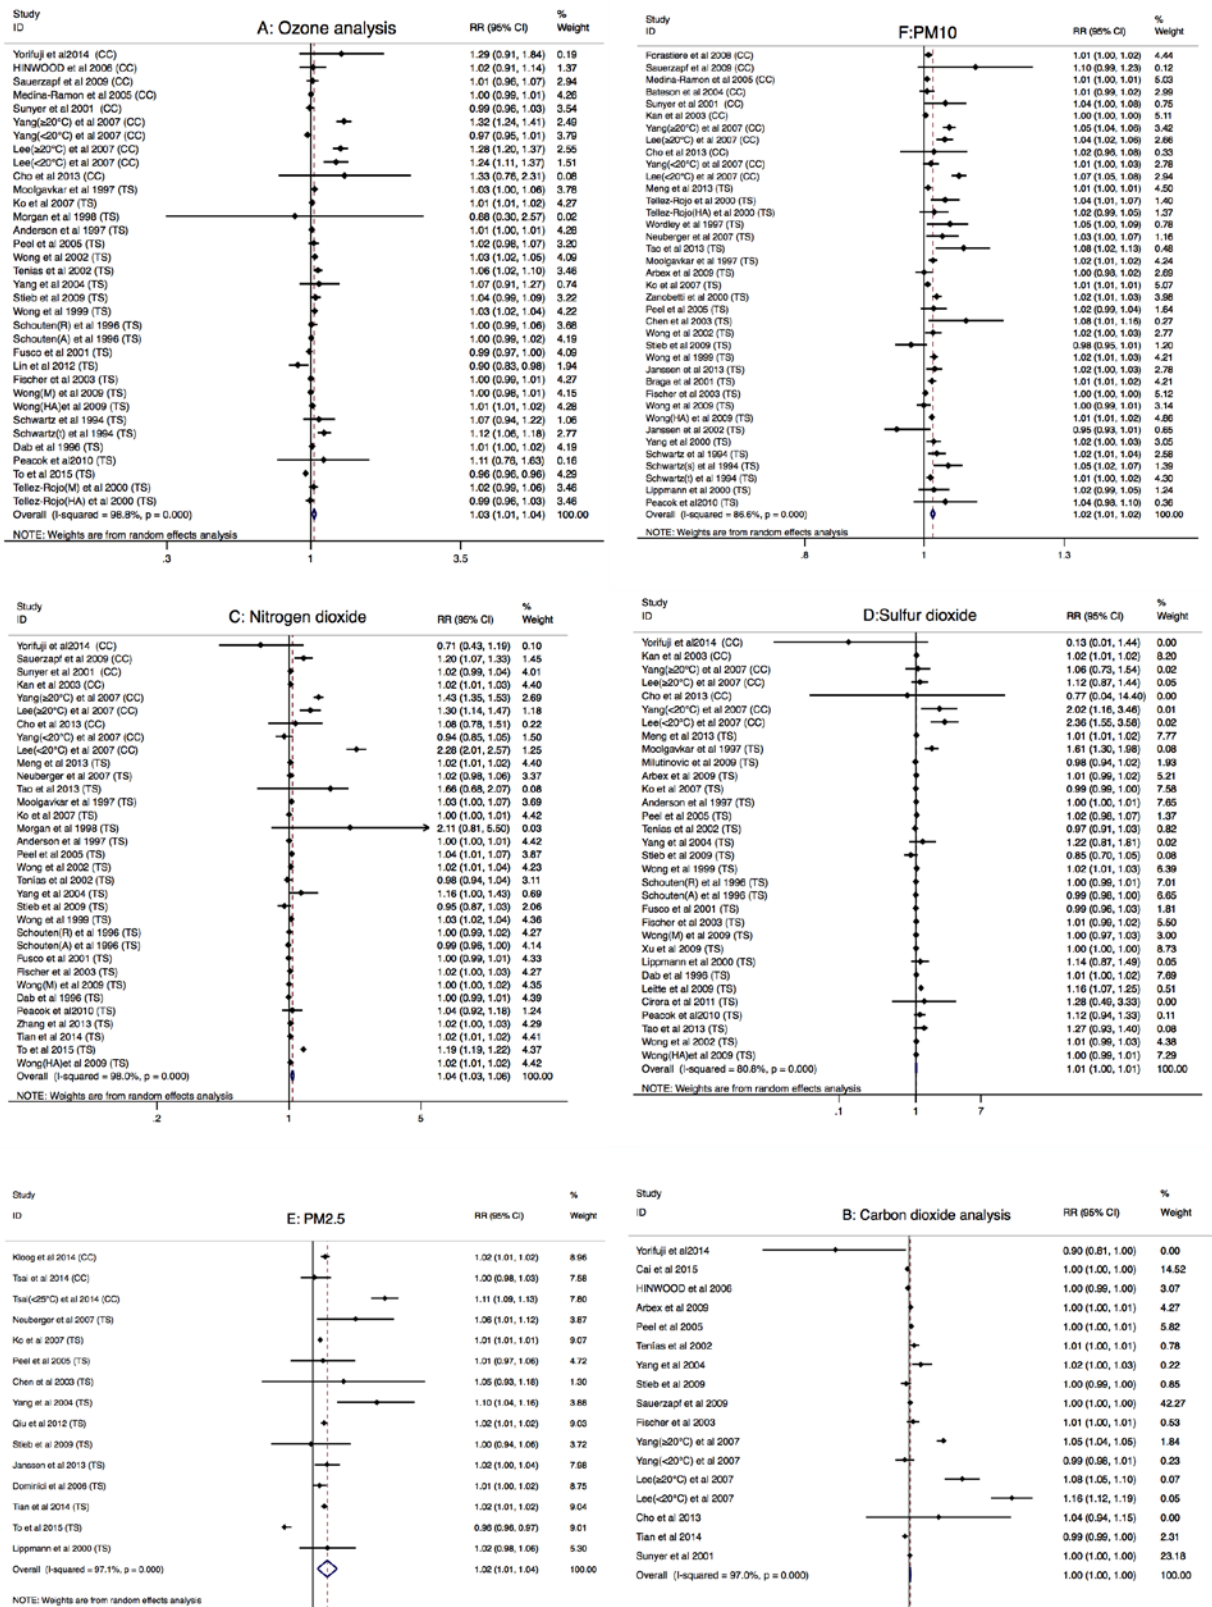

**Figure S2**

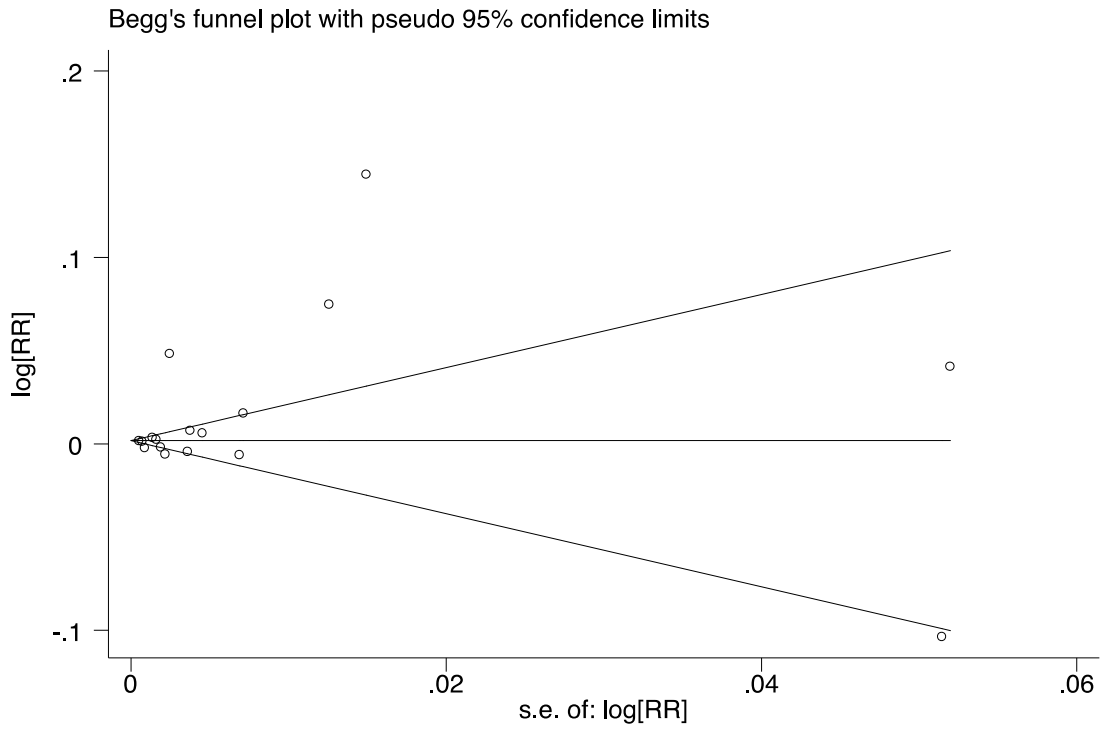

**A: Carbon monoxide**

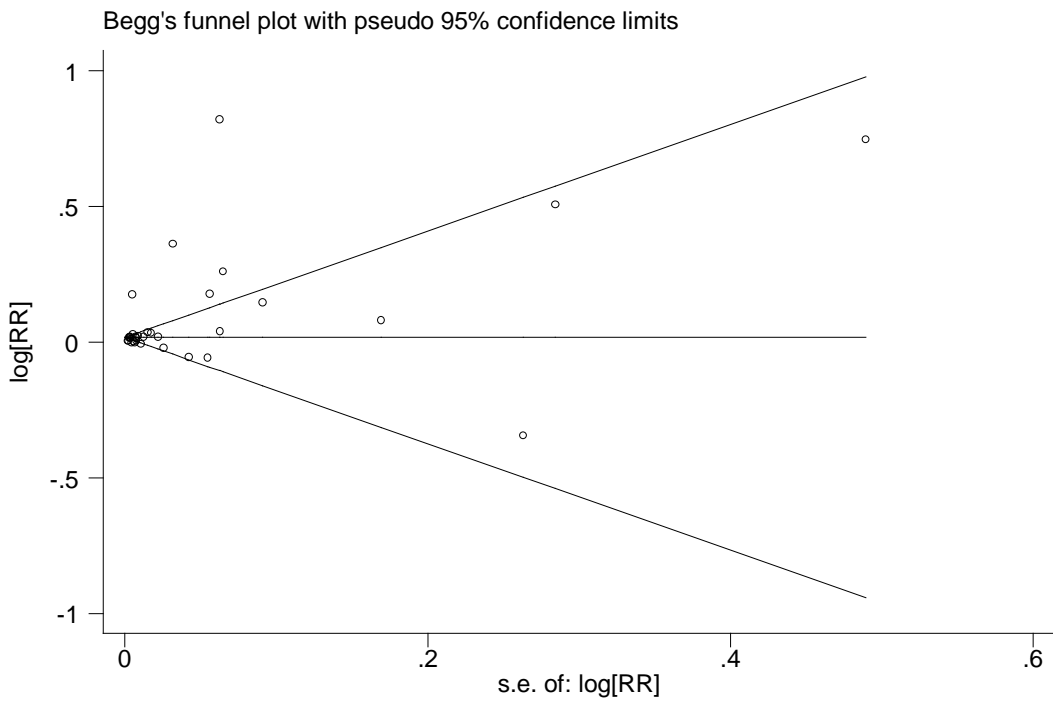

**B: Nitrogen dioxide**

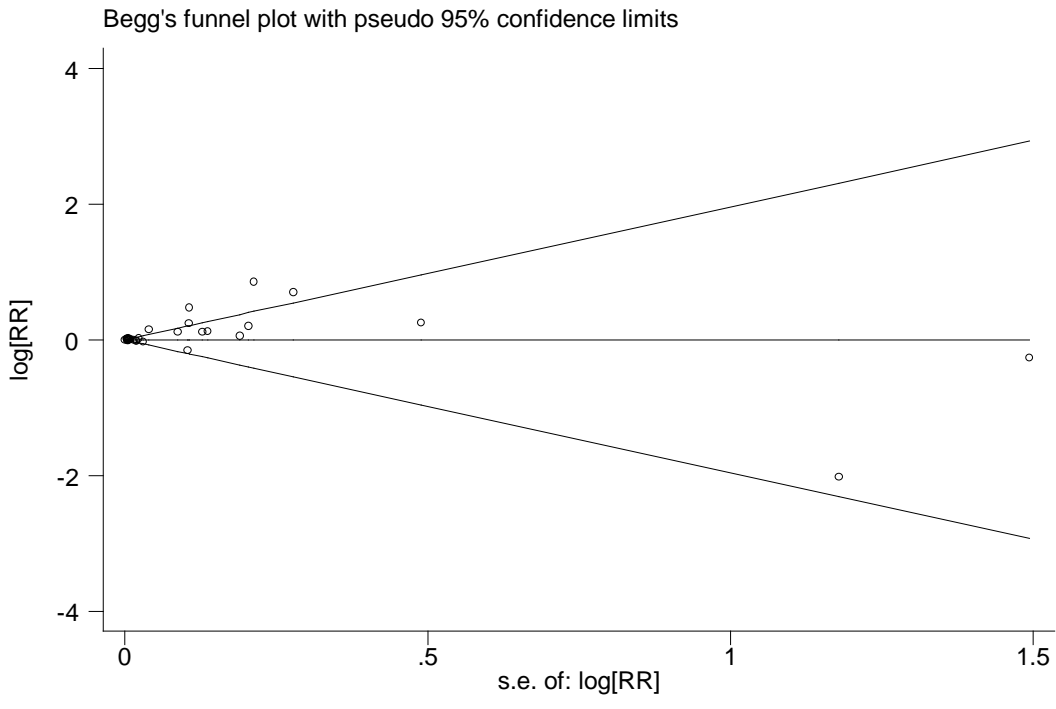

**C: Sulphur dioxide**

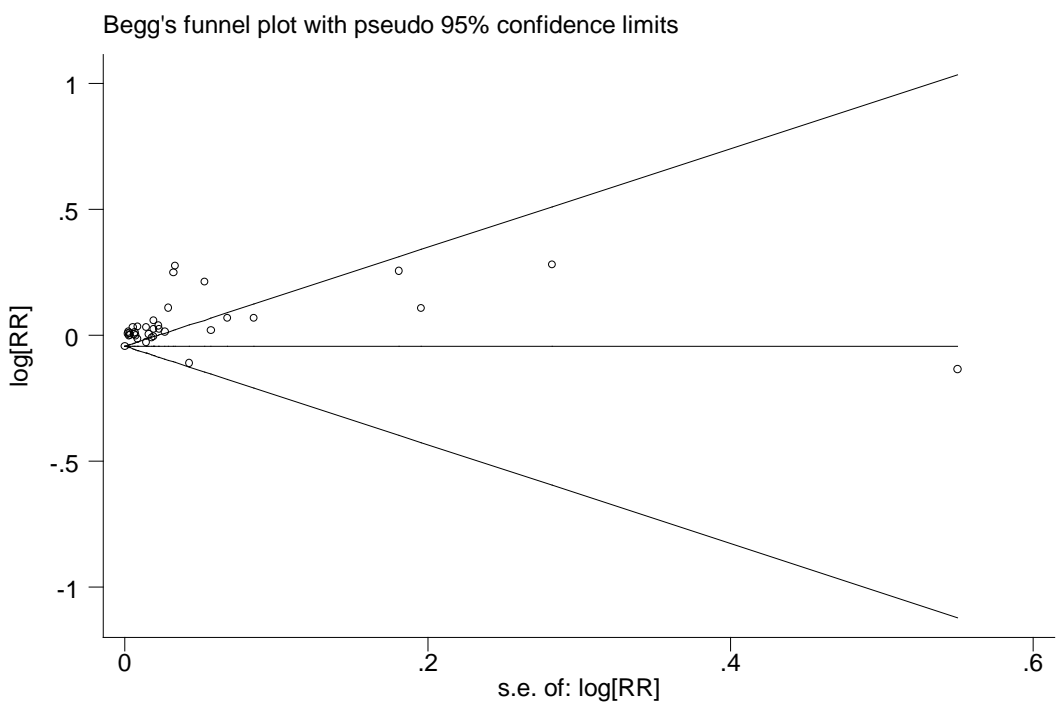

**D: Ozone**

Begg's funnel plot with pseudo 95% confidence limits

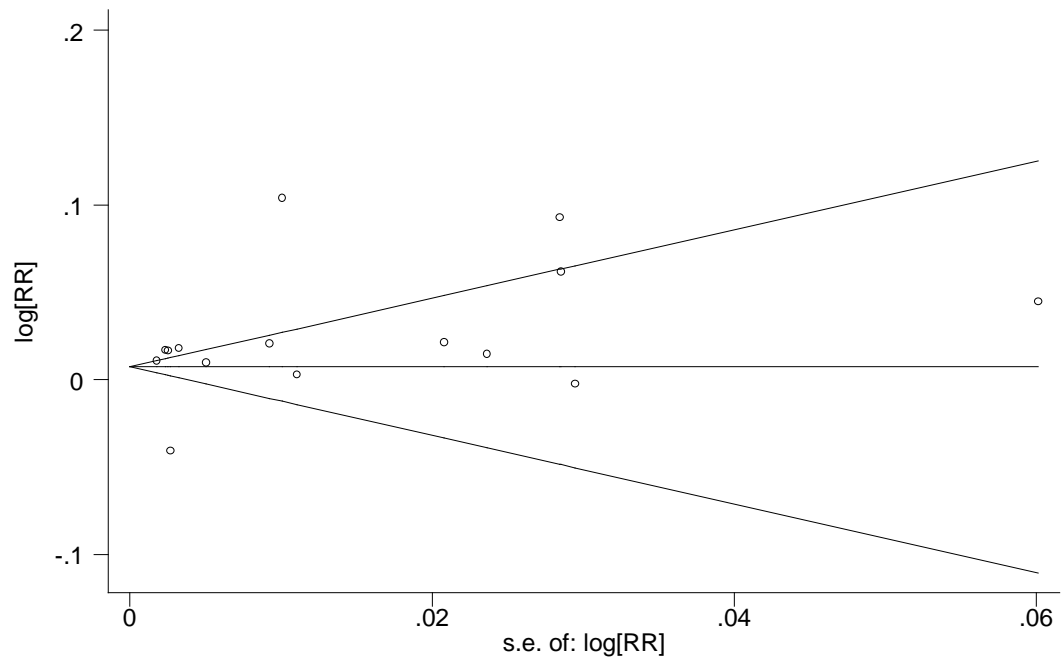

## Supplementary Figure Legends

**Figure S1** Association between air pollutants and hospitalization/mortality for COPD in overall analyses

**Figure S2** Funnel plots for RR of mortality/ hospitalization for COPD exposure to air pollutants

### Supplementary Included Reference

1. Kloog I, Nordio F, Zanobetti A, Coull BA, Koutrakis P, Schwartz JD. Short term effects of particle exposure on hospital admissions in the Mid-Atlantic states: a population estimate. *PloS one* 2014;9(2):e88578.
2. Meng X, Wang C, Cao D, Wong C-M, Kan H. Short-term effect of ambient air pollution on COPD mortality in four Chinese cities. *Atmospheric environment* 2013;77:149-54.
3. Tellez-Rojo M, Romieu I, Ruiz-Velasco S, Lezana M, Hernandez-Avila M. Daily respiratory mortality and PM10 pollution in Mexico City: importance of considering place of death. *European Respiratory Journal* 2000;16(3):391-96.
4. Wordley J, Walters S, Ayres JG. Short term variations in hospital admissions and mortality and particulate air pollution. *Occupational and environmental medicine* 1997;54(2):108-16.
5. Neuberger M, Rabcszenko D, Moshhammer H. Extended effects of air pollution on cardiopulmonary mortality in Vienna. *Atmospheric Environment* 2007;41(38):8549-56.
6. Yorifuji T, Suzuki E, Kashima S. Hourly differences in air pollution and risk of respiratory disease in the elderly: a time-stratified case-crossover study. *Environmental Health* 2014;13(1):67.
7. Schikowski T, Adam M, Marcon A, Cai Y, Vierkötter A, Carsin AE, et al. Association of ambient air pollution with the prevalence and incidence of COPD. *Eur Respir J* 2014;44(3):614-26.
8. Tao Y, Mi S, Zhou S, Wang S, Xie X. Air pollution and hospital admissions for respiratory diseases in Lanzhou, China. *Environmental pollution* 2014;185:196-201.
9. Moolgavkar SH, Luebeck EG, Anderson EL. Air pollution and hospital admissions for respiratory causes in Minneapolis-St. Paul and Birmingham. *Epidemiology* 1997:364-70.
10. Hinwood A, De Klerk N, Rodriguez C, Jacoby P, Runnion T, Rye P, et al. The relationship between changes in daily air pollution and hospitalizations in Perth, Australia 1992–1998: a case-crossover study. *International journal of environmental health research* 2006;16(1):27-46.
11. Milutinovic S, Nikic D, Stosic L, Stankovic A, Bogdanovic D. Short-term association between air pollution and emergency room admissions for chronic obstructive pulmonary disease in Nis, Serbia. *Central European journal of public health* 2009;17(1):8.
12. Arbex MA, de Souza Conceição GM, Cendon SP, Arbex FF, Lopes AC, Moyses EP, et al. Urban air pollution and chronic obstructive pulmonary disease-related emergency

- department visits. *Journal of epidemiology and community health* 2009;63(10):777-83.
13. Forastiere F, Stafoggia M, Berti G, Bisanti L, Cernigliaro A, Chiusolo M, et al. Particulate matter and daily mortality: a case-crossover analysis of individual effect modifiers. *Epidemiology* 2008;19(4):571-80.
  14. Ko FW, Tam W, Wong TW, Chan DP, Tung AH, Lai CK, et al. Temporal relationship between air pollutants and hospital admissions for chronic obstructive pulmonary disease in Hong Kong. *Thorax* 2007;62(9):780-85.
  15. Zanobetti A, Schwartz J, Dockery DW. Airborne particles are a risk factor for hospital admissions for heart and lung disease. *Environmental health perspectives* 2000;108(11):1071.
  16. Morgan G, Corbett S, Wlodarczyk J. Air pollution and hospital admissions in Sydney, Australia, 1990 to 1994. *American journal of public health* 1998;88(12):1761-66.
  17. Anderson H, Spix C, Medina S, Schouten J, Castellsague J, Rossi G, et al. Air pollution and daily admissions for chronic obstructive pulmonary disease in 6 European cities: results from the APHEA project. *European respiratory journal* 1997;10(5):1064-71.
  18. Peel JL, Tolbert PE, Klein M, Metzger KB, Flanders WD, Todd K, et al. Ambient air pollution and respiratory emergency department visits. *Epidemiology* 2005;16(2):164-74.
  19. Chen Y, Yang Q, Krewski D, Shi Y, Burnett RT, McGrail K. Influence of relatively low level of particulate air pollution on hospitalization for COPD in elderly people. *Inhalation toxicology* 2004;16(1):21-25.
  20. Wong T, Tam W, Yu T, Wong A. Associations between daily mortalities from respiratory and cardiovascular diseases and air pollution in Hong Kong, China. *Occupational and environmental medicine* 2002;59(1):30-35.
  21. Tenias JM, Ballester F, Perez-Hoyos S, Rivera ML. Air pollution and hospital emergency room admissions for chronic obstructive pulmonary disease in Valencia, Spain. *Archives of Environmental Health* 2002;57(1):41-47.
  22. Yang Q, Chen Y, Krewski D, Burnett RT, Shi Y, McGrail KM. Effect of short-term exposure to low levels of gaseous pollutants on chronic obstructive pulmonary disease hospitalizations. *Environmental Research* 2005;99(1):99-105.
  23. Qiu H, Yu IT-s, Tian L, Wang X, Tse LA, Tam W, et al. Effects of coarse particulate matter on emergency hospital admissions for respiratory diseases: a time-series analysis in Hong Kong. *Environmental health perspectives* 2012;120(4):572.
  24. Stieb DM, Szyzkowicz M, Rowe BH, Leech JA. Air pollution and emergency department visits for cardiac and respiratory conditions: a multi-city time-series analysis. *Environ Health* 2009;8(25):10.1186.
  25. Wong TW, Lau TS, Yu TS, Neller A, Wong SL, Tam W, et al. Air pollution and hospital admissions for respiratory and cardiovascular diseases in Hong Kong. *Occupational and environmental medicine* 1999;56(10):679-83.
  26. Schouten J, Vonk J, De Graaf A. Short term effects of air pollution on emergency hospital admissions for respiratory disease: results of the APHEA project in two major cities in The Netherlands, 1977-89. *Journal of epidemiology and community health* 1996;50(Suppl 1):s22-s29.
  27. Fusco D, Forastiere F, Michelozzi P, Spadea T, Ostro B, Arca M, et al. Air pollution and hospital admissions for respiratory conditions in Rome, Italy. *European respiratory journal* 2001;17(6):1143-50.
  28. Sauerzapf V, Jones AP, Cross J. Environmental factors and hospitalisation for chronic obstructive pulmonary disease in a rural county of England. *Journal of Epidemiology and Community Health* 2009;63(4):324-28.



29. Medina-Ramon M, Zanobetti A, Schwartz J. The effect of ozone and PM10 on hospital admissions for pneumonia and chronic obstructive pulmonary disease: A national multicity study. *American Journal of Epidemiology* 2006;163(6):579-88.
30. Janssen N, Fischer P, Marra M, Ameling C, Cassee F. Short-term effects of PM 2.5, PM 10 and PM 2.5–10 on daily mortality in the Netherlands. *Science of the Total Environment* 2013;463:20-26.
31. Lin Y, Chang S, Lin C, Chen Y, Wang Y. Comparing ozone metrics on associations with outpatient visits for respiratory diseases in Taipei Metropolitan area. *Environmental Pollution* 2013;177:177-84.
32. Bateson TF, Schwartz J. Who is sensitive to the effects of particulate air pollution on mortality? A case-crossover analysis of effect modifiers. *Epidemiology* 2004;15(2):143-49.
33. Sunyer J, Schwartz J, Tobias A, Macfarlane D, Garcia J, Anto JM. Patients with chronic obstructive pulmonary disease are at increased risk of death associated with urban particle air pollution: A case-crossover analysis. *American Journal of Epidemiology* 2000;151(1):50-56.
34. Kan H, Chen B. Air Pollution and Daily Mortality in Shanghai: A Time-Series Study. *Archives of Environmental Health* 2003;58(6):360-67.
35. Braga ALF, Zanobetti A, Schwartz J. The lag structure between particulate air pollution and respiratory and cardiovascular deaths in 10 US cities. *Journal of Occupational and Environmental Medicine* 2001;43(11):927-33.
36. Schwartz J, Dockery DW. Increased mortality in Philadelphia associated with daily air pollution concentrations. *American review of respiratory disease* 1992;145(3):600-04.
37. Fischer P, Hoek G, Brunekreef B, Verhoeff A, Van Wijnen J. Air pollution and mortality in The Netherlands: are the elderly more at risk? *European respiratory journal* 2003;21(40 suppl):34s-38s.
38. Wong PM, Lees AN, Louw J, Lee FY, French N, Gain K, et al. Emphysema in young adult survivors of moderate-to-severe bronchopulmonary dysplasia. *European Respiratory Journal* 2008;32(2):321-28.
39. Xu Z, Yu D, Jing L, Xu X. Air pollution and daily mortality in Shenyang, China. *Archives of Environmental Health: An International Journal* 2000;55(2):115-20.
40. Janssen NAH, Schwartz J, Zanobetti A, Suh HH. Air conditioning and source-specific particles as modifiers of the effect of PM10 on hospital admissions for heart and lung disease. *Environmental Health Perspectives* 2002;110(1):43-49.
41. Dominici F, Peng RD, Bell ML, Pham L, McDermott A, Zeger SL, et al. Fine particulate air pollution and hospital admission for cardiovascular and respiratory diseases. *Jama* 2006;295(10):1127-34.
42. Yang CY, Chen CJ. Air pollution and hospital admissions for chronic obstructive pulmonary disease in a subtropical city: Taipei, Taiwan. *Journal of Toxicology and Environmental Health Part A: Current Issues* 2007;70(14):1214-19.
43. Schwartz J. PM10, ozone, and hospital admissions for the elderly in Minneapolis-St. Paul, Minnesota. *Archives of Environmental Health* 1994;49(5):366-74.
44. Schwartz J. Air pollution and hospital admissions for the elderly in Detroit, Michigan. *American Journal of Respiratory and Critical Care Medicine* 1994;150(3):648-55.
45. Schwartz J. Air pollution and hospital admissions for the elderly in Birmingham, Alabama. *American Journal of Epidemiology* 1994;139(6):589-98.
46. Sunyer J, Saez M, Murillo C, Castellsague J, Martinez F, Anto JM. Air pollution and emergency room admissions for chronic obstructive pulmonary disease: A 5-year study. *American Journal of Epidemiology* 1993;137(7):701-05.

47. Lippmann M, Ito K, Nadas A, Burnett R. Association of particulate matter components with daily mortality and morbidity in urban populations. *Research report (Health Effects Institute)* 2000(95):5-72, discussion 73-82.
48. Dab W, Medina S, Quenel P, Le Moullec Y, Le Tertre A, Thelot B, et al. Short term respiratory health effects of ambient air pollution: results of the APHEA project in Paris. *Journal of epidemiology and community health* 1996;50(Suppl 1):s42-s46.
49. Leitte AM, Petrescu C, Franck U, Richter M, Suciuc O, Ionovici R, et al. Respiratory health, effects of ambient air pollution and its modification by air humidity in Drobeta-Turnu Severin, Romania. *Science of the Total Environment* 2009;407(13):4004-11.
50. Pande J, Bhatta N, Biswas D, Pandey RM, Ahluwalia G, Siddaramaiah NH, et al. Outdoor air pollution and emergency room visits at a hospital in Delhi. *Indian Journal of Chest Diseases and Allied Sciences* 2002;44(1):13-20.
51. Cirera L, García-Marcos L, Giménez J, Moreno-Grau S, Tobías A, Pérez-Fernández V, et al. Daily effects of air pollutants and pollen types on asthma and COPD hospital emergency visits in the industrial and Mediterranean Spanish city of Cartagena. *Allergologia et immunopathologia* 2012;40(4):231-37.
52. Yang C-Y, Chen C-J. Air pollution and hospital admissions for chronic obstructive pulmonary disease in a subtropical city: Taipei, Taiwan. *Journal of Toxicology and Environmental Health, Part A* 2007;70(14):1214-19.
53. Lee I-M, Tsai S-S, Chang C-C, Ho C-K, Yang C-Y. Air pollution and hospital admissions for chronic obstructive pulmonary disease in a tropical city: Kaohsiung, Taiwan. *Inhalation toxicology* 2007;19(5):393-98.
54. Peacock JL, Anderson HR, Bremner SA, Marston L, Seemungal TA, Strachan DP, et al. Outdoor air pollution and respiratory health in patients with COPD. *Thorax* 2011;thx.2010.155358.
55. Zhang Z, Wang J, Chen L, Chen X, Sun G, Zhong N, et al. Impact of haze and air pollution-related hazards on hospital admissions in Guangzhou, China. *Environmental Science and Pollution Research* 2014;21(6):4236-44.
56. Cho J, Choi YJ, Suh M, Sohn J, Kim H, Cho S-K, et al. Air pollution as a risk factor for depressive episode in patients with cardiovascular disease, diabetes mellitus, or asthma. *Journal of affective disorders* 2014;157:45-51.
57. Tian L, Ho KF, Wang T, Qiu H, Pun VC, Chan CS, et al. Ambient carbon monoxide and the risk of hospitalization due to chronic obstructive pulmonary disease. *American Journal of Epidemiology* 1159;180(12):1159-67.
58. To T, Feldman L, Simatovic J, Gershon AS, Dell S, Su J, et al. Health risk of air pollution on people living with major chronic diseases: a Canadian population-based study. *BMJ open* 2015;5(9):e009075.
59. Cai J, Chen R, Wang W, Xu X, Ha S, Kan H. Does ambient CO have protective effect for COPD patient? *Environ Res* 2015;136:21-6.
